# Supplementary material
Source: publisher figshare collection journal article supplement (https://frontiersin.figshare.com/ndownloader/files/22818413)
Supplement: Supplementary file [file 22818413]

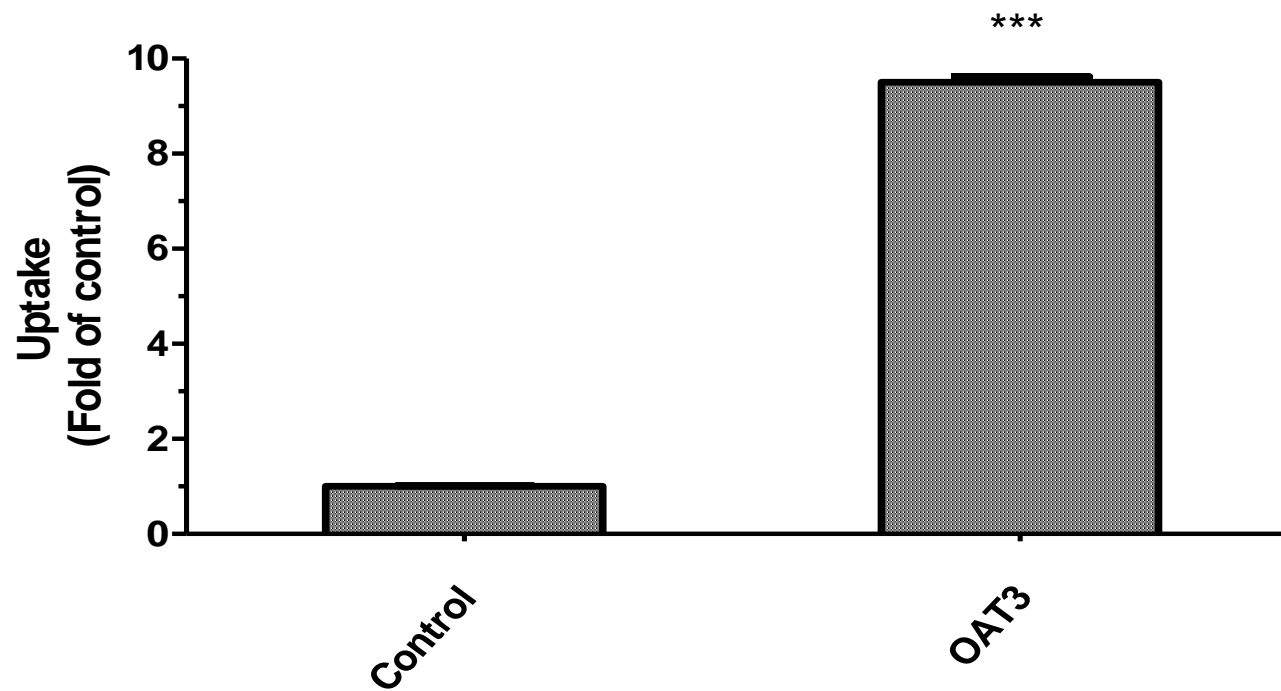

**Supplementary Figure 1.** Uptake of enalapril in OAT3-transfected HEK293 cells. Enalapril concentration was 10  $\mu$ M and incubation time was 5 min. Data were presented as mean  $\pm$  sd. \*\*\*P<0.001.
